# Supplementary material for: Predictors of Trachomatous Trichiasis Surgery Outcome
Source: PubMed Central journal article supplement (PMC5540045; doi:10.1016/j.ophtha.2017.03.016), 2017-08
Supplement: mmc1.pdf [file mmc1.pdf]

**Supplemental Table S1: Univariable and multivariable analysis of baseline factors associated with preoperative TT severity**

| Variable                            | Minor TT |         | Major TT |         | Univariable Analysis |               |         | Multivariable analysis |               |                      |
|-------------------------------------|----------|---------|----------|---------|----------------------|---------------|---------|------------------------|---------------|----------------------|
|                                     | n/525    | (%)     | n/475    | (%)     | OR                   | (95% CI)      | P-value | OR                     | 95% CI        | P-value              |
| Sex, Female                         | 372      | (70.9%) | 393      | (82.7%) | 1.97                 | (1.45 – 2.67) | <0.0001 | 2.29                   | (1.64 – 3.21) | <0.0001              |
| Age, mean (SD)                      | 46.1     | (14.6%) | 48.7     | (15.2%) | 1.01                 | (1.01 – 1.03) | 0.005   | 1.02                   | (1.01 – 1.03) | 0.02                 |
| Lash location                       |          |         |          |         |                      |               |         |                        |               |                      |
| Corneal only                        | 428      | (81.5%) | 331      | (69.7%) | 0.52                 | (0.39 – 0.70) | <0.0001 | 0.65                   | (0.41 – 1.05) | 0.08                 |
| Peripheral only                     | 10       | (1.9%)  | 6        | (1.3%)  | 0.66                 | (0.24 – 1.83) | 0.42    | -                      | -             | -                    |
| Mixed                               | 46       | (8.8%)  | 97       | (20.4%) | 2.67                 | (1.83 – 3.89) | <0.0001 | -                      | -             | -                    |
| Lash type                           |          |         |          |         |                      |               |         |                        |               |                      |
| Entropic                            | 146      | (27.8%) | 97       | (20.4%) | 0.67                 | (0.50 – 0.89) | 0.007   | 0.70                   | (0.49 – 1.01) | 0.06                 |
| Metaplastic                         | 229      | (43.6%) | 201      | (42.3%) | 0.95                 | (0.74 – 1.22) | 0.68    | -                      | -             | -                    |
| Misdirected                         | 21       | (4.0%)  | 2        | (0.4%)  | 0.10                 | (0.02 – 0.43) | 0.002   | 0.22                   | (0.05 – 0.99) | 0.05                 |
| Mixed                               | 88       | (16.7%) | 134      | (28.2%) | 1.95                 | (1.44 – 2.64) | <0.0001 | 1.45                   | (1.01 – 2.06) | 0.05                 |
| Lower lid TT                        | 36       | (6.9%)  | 54       | (11.4%) | 1.74                 | (1.12 – 2.71) | 0.01    | 1.52                   | (0.94 – 2.44) | 0.09                 |
| Papillary grade                     |          |         |          |         |                      |               |         |                        |               |                      |
| None                                | 10       | (1.9%)  | 5        | (1.1%)  | 1.84                 | (1.50 – 2.25) | <0.0001 | 1.54                   | (1.23 – 1.94) | 0.0002 <sup>†</sup>  |
| Mild                                | 167      | (31.8%) | 81       | (17.1%) |                      |               |         |                        |               |                      |
| Moderate                            | 298      | (56.8%) | 305      | (64.2%) |                      |               |         |                        |               |                      |
| Severe                              | 50       | (9.5%)  | 84       | (17.7%) |                      |               |         |                        |               |                      |
| Tarsal conjunctiva scar             |          |         |          |         |                      |               |         |                        |               |                      |
| Mild                                | 76       | (14.5%) | 31       | (6.5%)  | 2.23                 | (1.72 – 2.91) | <0.0001 | 2.08                   | (1.54 – 2.82) | <0.0001 <sup>†</sup> |
| Moderate                            | 398      | (75.8%) | 342      | (72.0%) |                      |               |         |                        |               |                      |
| Severe                              | 51       | (9.7%)  | 102      | (21.5%) |                      |               |         |                        |               |                      |
| Corneal scar                        |          |         |          |         |                      |               |         |                        |               |                      |
| CCO                                 | 171      | (32.6%) | 82       | (17.3%) | 1.61                 | (1.37 – 1.89) | <0.0001 | 1.30                   | (1.09 – 1.56) | 0.004 <sup>†</sup>   |
| CC1                                 | 205      | (39.1%) | 200      | (42.1%) |                      |               |         |                        |               |                      |
| CC2                                 | 143      | (27.2%) | 173      | (36.4%) |                      |               |         |                        |               |                      |
| CC3                                 | 6        | (1.1%)  | 20       | (4.2%)  |                      |               |         |                        |               |                      |
| Best corrected logMAR visual acuity |          |         |          |         |                      |               |         |                        |               |                      |
| -1.0 – 0.29                         | 169      | (32.2%) | 109      | (22.9%) | 1.19                 | (1.07 – 1.33) | 0.002   | -                      | -             | -                    |
| 0.3 – 0.69                          | 207      | (39.4%) | 192      | (40.4%) |                      |               |         |                        |               |                      |
| 0.7 – 1.0                           | 94       | (17.9%) | 116      | (24.4%) |                      |               |         |                        |               |                      |
| 1.1 – 1.9                           | 22       | (4.2%)  | 14       | (2.9%)  |                      |               |         |                        |               |                      |
| 2.0 – 3.0/CF, HM, LP                | 29       | (5.5%)  | 35       | (7.4%)  |                      |               |         |                        |               |                      |
| 3.5/NLP                             | 4        | (0.8%)  | 9        | (1.9%)  |                      |               |         |                        |               |                      |

Note: Analysis made using logistic regression. <sup>†</sup> P-value for trend
